# Supplementary material
Source: PubMed Central journal article supplement (PMC9135691)
Supplement: mmc3.pdf [file mmc3.pdf]

# Injection Site 1

## Control

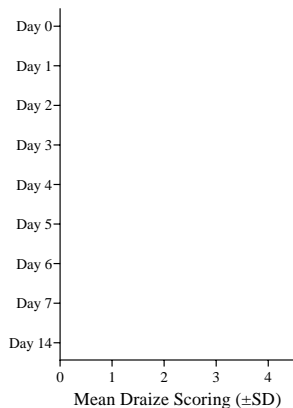

## [Prime & Boost] CoVLP + AS03

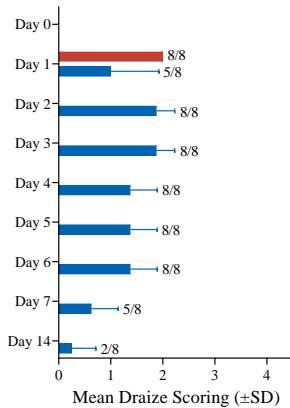

## [Prime & Boost] CoVLP.B1351 + AS03

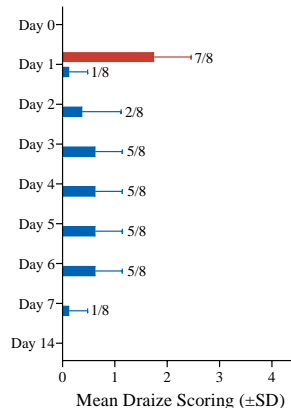

## [Prime] CoVLP + AS03 [Boost] CoVLP.B1351 + AS03

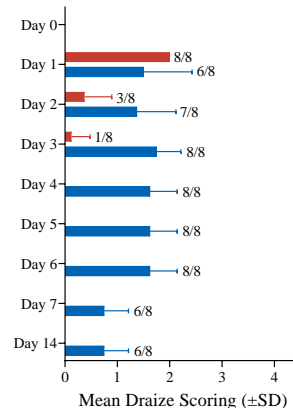

# Injection Site 2

## Control

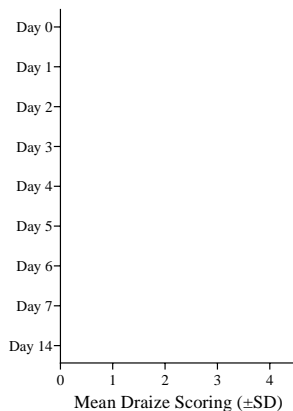

## [Prime & Boost] CoVLP + AS03

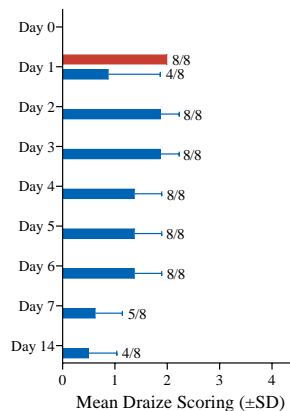

## [Prime & Boost] CoVLP.B1351 + AS03

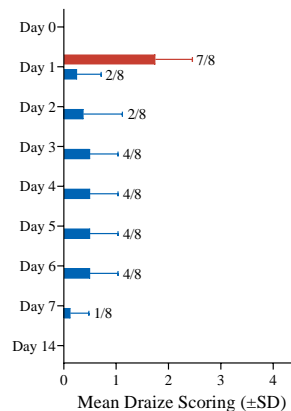

## [Prime] CoVLP + AS03 [Boost] CoVLP.B1351 + AS03

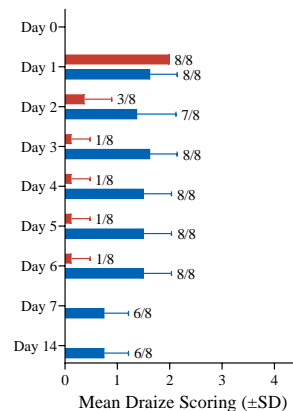

 Erythema  Edema
